# Supplementary material for: KMT2A partner genes in infant acute lymphoblastic leukemia have prognostic significance and correlate with age, white blood cell count, sex, and central nervous system involvement: a Children’s Oncology Group P9407 trial study
Source: PubMed Central journal article supplement — Haematologica. 2023 Mar 2;108(10):2865–71. doi: 10.3324/haematol.2022.281552 (PMC10543184; doi:10.3324/haematol.2022.281552), 2023-03-02
Supplement: 2022_281552_ROBINSON_SUPPL.pdf [file 2022_281552_ROBINSON_SUPPL.pdf]

# ***KMT2A* partner genes in infant acute lymphoblastic leukemia have prognostic significance and correlate with age, white blood cell count, sex, and central nervous system involvement: a Children's Oncology Group P9407 trial study**

Blaine W. Robinson,<sup>1\*</sup> John A. Kairalla,<sup>2</sup> Meenakshi Devidas,<sup>3</sup> Andrew J. Carroll,<sup>4</sup> Richard C. Harvey,<sup>5</sup> Nyla A. Heerema,<sup>6</sup> Cheryl L. Willman,<sup>7</sup> Amanda R. Ball,<sup>1\*</sup> Elliot C. Woods,<sup>1\*</sup> Nancy C. Ballantyne,<sup>1\*</sup> Karen A. Urtishak,<sup>1\*</sup> Frederick G. Behm,<sup>8</sup> Gregory H. Reaman,<sup>9\*</sup> Joanne M. Hilden,<sup>10</sup> Bruce M. Camitta,<sup>11</sup> Naomi J. Winick,<sup>12</sup> Jeanette Pullen,<sup>13</sup> William L. Carroll,<sup>14</sup> Stephen P. Hunger,<sup>15</sup> ZoAnn E. Dreyer<sup>16</sup> and Carolyn A. Felix<sup>15</sup>

<sup>1</sup>Division of Oncology and the Center for Childhood Cancer Research, Children's Hospital of Philadelphia, Philadelphia, PA; <sup>2</sup>Department of Biostatistics, University of Florida College of Public Health and Health Professions and College of Medicine, Gainesville, FL; <sup>3</sup>Department of Global Pediatric Medicine, St Jude Children's Research Hospital, Memphis, TN; <sup>4</sup>Department of Genetics, University of Alabama at Birmingham, Birmingham, AL; <sup>5</sup>University of New Mexico Cancer Center and Department of Pathology, Albuquerque, NM; <sup>6</sup>Department of Pathology, The Ohio State University Comprehensive Cancer Center, Columbus, OH; <sup>7</sup>Mayo Clinic Comprehensive Cancer Center, Rochester, MN; <sup>8</sup>Department of Pathology, University of Illinois at Chicago, Chicago, IL; <sup>9</sup>Children's National Medical Center, Washington DC; <sup>10</sup>Center for Cancer and Blood Disorders, Children's Hospital Colorado, Aurora, CO; <sup>11</sup>Medical College of Wisconsin, Milwaukee, WI; <sup>12</sup>Division of Pediatric Hematology/Oncology, University of Texas Southwestern School of Medicine, Dallas, TX; <sup>13</sup>Pediatric Hematology/Oncology, University of Mississippi Medical Center, Jackson, MS; <sup>14</sup>Department of Pediatrics and Perlmutter Cancer Center, NYU Langone Health, New York, NY; <sup>15</sup>Department of Pediatrics, Perelman School of Medicine at the University of Pennsylvania, Philadelphia, PA and <sup>16</sup>Texas Children's Cancer Center, Houston, TX, USA

<sup>\*</sup>Current address

*BWR: Therapy Acceleration Program, The Leukemia & Lymphoma Society, Rye Brook, NY; ARB: Division of Neonatology, Children's Hospital of Philadelphia, Philadelphia, PA; ECW: Department of Medicine, Massachusetts General Hospital, Boston, MA; NCB: General Radiology, Wake Forest Baptist Medical Center, Greensboro, NC; KAU: Oncology Translational Research, Janssen Research and Development, Spring House, PA and GHR: Childhood Cancer Data Initiative, National Cancer Institute, National Institutes of Health, Bethesda, MD, USA*

Correspondence:

C. A. FELIX - felix@chop.edu

<https://doi.org/10.3324/haematol.2022.281552>

## **SUPPLEMENTARY MATERIALS**

### ***KMT2A* partner genes in infant acute lymphoblastic leukemia have prognostic significance and correlate with age, white blood cell count, sex, and central nervous system involvement: A Children's Oncology Group P9407 trial study**

Blaine W. Robinson<sup>1</sup>, John A. Kairalla<sup>2</sup>, Meenakshi Devidas<sup>3</sup>, Andrew J. Carroll<sup>4</sup>, Richard C. Harvey<sup>5</sup>, Nyla A. Heerema<sup>6</sup>, Cheryl L. Willman<sup>7</sup>, Amanda R. Ball<sup>1</sup>, Elliot C. Woods<sup>1</sup>, Nancy C. Ballantyne<sup>1</sup>, Karen A. Urtishak<sup>1</sup>, Frederick G. Behm<sup>8</sup>, Gregory H. Reaman<sup>9</sup>, Joanne M. Hilden<sup>10</sup>, Bruce M. Camitta<sup>11</sup>, Naomi J. Winick<sup>12</sup>, Jeanette Pullen<sup>13</sup>, William L. Carroll<sup>14</sup>, Stephen P. Hunger<sup>1,15</sup>, ZoAnn E. Dreyer<sup>16</sup>, Carolyn A. Felix<sup>1,15</sup>

<sup>1</sup>Division of Oncology and the Center for Childhood Cancer Research, Children's Hospital of Philadelphia, Philadelphia, PA, USA

<sup>2</sup>Department of Biostatistics, University of Florida College of Public Health and Health Professions and College of Medicine, Gainesville, FL, USA

<sup>3</sup>Department of Global Pediatric Medicine, St Jude Children's Research Hospital, Memphis, TN, USA

<sup>4</sup>Department of Genetics, University of Alabama at Birmingham, Birmingham, AL, USA

<sup>5</sup>University of New Mexico Cancer Center and Department of Pathology, Albuquerque, NM, USA

<sup>6</sup>Department of Pathology, The Ohio State University Comprehensive Cancer Center, Columbus, OH, USA

<sup>7</sup>Mayo Clinic Comprehensive Cancer Center, Rochester, MN, USA

<sup>8</sup>Department of Pathology, University of Illinois at Chicago, Chicago, IL, USA

<sup>9</sup>Children's National Medical Center, Washington DC, USA

<sup>10</sup>Center for Cancer and Blood Disorders, Children's Hospital Colorado, Aurora, CO, USA

<sup>11</sup>Medical College of Wisconsin, Milwaukee, WI, USA

<sup>12</sup>Division of Pediatric Hematology/Oncology, University of Texas Southwestern School of Medicine, Dallas, TX, USA

<sup>13</sup>Pediatric Hematology/Oncology, University of Mississippi Medical Center, Jackson, MS, USA

<sup>14</sup>Department of Pediatrics and Perlmutter Cancer Center, NYU Langone Health, New York, NY, USA

<sup>15</sup>Department of Pediatrics, Perelman School of Medicine at the University of Pennsylvania, Philadelphia, PA, USA

<sup>16</sup>Texas Children's Cancer Center, Houston, TX, USA

## Table of Contents

|                                                                                                                                           |          |
|-------------------------------------------------------------------------------------------------------------------------------------------|----------|
| <i>Supplementary Table 1. Alternate multivariable Cox regression models. ....</i>                                                         | <b>4</b> |
| <i>Supplementary Table 2. Correlations of KMT2A-G vs. KMT2A-R status and partner genes with demographic and clinical covariates. ....</i> | <b>5</b> |
| <i>Supplementary Figure 1. Five-year EFS in COG P9407 infant ALL trial estimated by Kaplan-Meier method. ....</i>                         | <b>7</b> |

**Supplementary Table 1. Alternate multivariable Cox regression models**

|                                         | Only <i>KMT2A</i> -R Cases |        | Continuous Age        |        | Treatment Cohort Included |        |
|-----------------------------------------|----------------------------|--------|-----------------------|--------|---------------------------|--------|
|                                         | Estimated HR (95% CI)      | P*     | Estimated HR (95% CI) | P      | Estimated HR (95% CI)     | P      |
| <b>Sex</b>                              |                            |        |                       |        |                           |        |
| <b>Male</b>                             | 1.60 (1.04- 2.46)          | 0.032  | 1.53 (1.02- 2.28)     | 0.039  | 1.60 (1.07- 2.40)         | 0.022  |
| <b>Female</b>                           | Reference                  |        | Reference             |        | Reference                 |        |
| <b>Age at diagnosis (months)</b>        |                            |        | 0.84 (0.78- 0.91)     | <0.001 |                           |        |
| <b>≤ 90 days</b>                        | 2.89 (1.75- 4.78)          | <0.001 |                       |        | 2.61 (1.62- 4.21)         | <0.001 |
| <b>&gt; 90 days</b>                     | Reference                  |        |                       |        | Reference                 |        |
| <b>WBC count</b>                        |                            |        |                       |        |                           |        |
| <b>&lt; 50 × 10<sup>9</sup>/L</b>       | Reference                  |        | Reference             |        | Reference                 |        |
| <b>≥ 50 × 10<sup>9</sup>/L</b>          | 2.33 (1.11- 4.92)          | 0.026  | 2.43 (1.27- 4.66)     | 0.008  | 2.69 (1.41- 5.15)         | 0.003  |
| <b><i>KMT2A</i> Status/Partner Gene</b> |                            |        |                       |        |                           |        |
| <b><i>KMT2A</i>-G</b>                   |                            |        | Reference             |        | Reference                 |        |
| <b><i>KMT2A</i>-R</b>                   |                            |        |                       |        |                           |        |
| <b><i>AFF1</i></b>                      | Reference                  |        | 2.15 (1.17- 3.96)     | 0.014  | 2.49 (1.35- 4.59)         | 0.004  |
| <b><i>MLLT1</i></b>                     | 1.34 (0.80- 2.26)          | 0.272  | 2.61 (1.32- 5.17)     | 0.006  | 3.31 (1.67- 6.59)         | 0.001  |
| <b><i>MLLT3</i></b>                     | 0.41 (0.12- 1.38)          | 0.152  | 0.98 (0.28- 3.45)     | 0.969  | 1.05 (0.30- 3.71)         | 0.944  |
| <b>Other Partner Gene</b>               | 1.01 (0.52- 1.96)          | 0.983  | 2.15 (1.00- 4.63)     | 0.051  | 2.54 (1.17- 5.52)         | 0.019  |
| <b>Unknown Partner Gene</b>             | 1.13 (0.44- 2.94)          | 0.795  | 2.66 (0.96-7.40)      | 0.060  | 2.76 (0.98- 7.72)         | 0.054  |
| <b>CNS Status</b>                       |                            | 0.455  |                       | 0.912  |                           | 0.948  |
| <b>CNS1</b>                             | Reference                  |        | Reference             |        | Reference                 |        |
| <b>CNS2</b>                             | 1.36 (0.80- 2.31)          | 0.252  | 0.99 (0.60- 1.62)     | 0.96   | 1.07 (0.65- 1.76)         | 0.777  |
| <b>CNS3</b>                             | 1.03 (0.58- 1.84)          | 0.910  | 0.90 (0.53- 1.51)     | 0.69   | 1.00 (0.58- 1.70)         | 0.986  |
| <b>Treatment Cohort</b>                 |                            |        |                       |        |                           |        |
| <b>Cohorts 1 &amp; 2</b>                |                            |        |                       |        | Reference                 |        |
| <b>Cohort 3</b>                         |                            |        |                       |        | 0.92 (0.59- 1.43)         | 0.71   |

\* p-values correspond to Wald tests comparing to reference levels (or one unit increase) in joint models including all listed factors.

**Supplementary Table 2. Correlations of *KMT2A-G* vs. *KMT2A-R* status and partner genes with demographic and clinical covariates**

|                         | <i>KMT2A-R</i> | <i>AFF1</i> | <i>MLL1</i> | <i>MLL3</i> | <i>KMT2A-R</i><br>'Other' Partner<br>Gene | <i>KMT2A-R</i><br>'Unknown'<br>Partner Gene | <i>KMT2A-G</i> | Comparison                                                               | FET<br><i>P</i> value |
|-------------------------|----------------|-------------|-------------|-------------|-------------------------------------------|---------------------------------------------|----------------|--------------------------------------------------------------------------|-----------------------|
| Variable                | N (%)          | N (%)       | N (%)       | N (%)       | N (%)                                     | N (%)                                       | N (%)          |                                                                          |                       |
| <b>Age at diagnosis</b> |                |             |             |             |                                           |                                             |                | ≤ 90 d vs. >90 d                                                         |                       |
| ≤ 90 d                  | 40 (25.5%)     | 23(29.5%)   | 11 (33.3%)  | 3 (21.4%)   | 1 (5.0%)                                  | 2 (16.7%)                                   | 6 (11.5%)      | <i>KMT2A-G</i> vs. all <i>KMT2A-R</i>                                    | 0.036                 |
|                         |                |             |             |             |                                           |                                             |                | 'Other' <i>KMT2A-R</i> vs. <i>AFF1</i> ,<br><i>MLL1</i> or <i>MLL3</i>   | 0.026                 |
| > 90 d                  | 117 (74.5%)    | 55(70.5%)   | 22 (66.7%)  | 11 (78.6%)  | 19 (95.0%)                                | 10 (83.3%)                                  | 46 (88.5%)     | <i>AFF1</i> vs. all non- <i>AFF1</i><br><i>KMT2A-R</i> *                 | 0.35                  |
|                         |                |             |             |             |                                           |                                             |                | <i>AFF1</i> vs. <i>MLL3</i>                                              | 0.75                  |
|                         |                |             |             |             |                                           |                                             |                | <i>AFF1</i> vs. 'Other' <i>KMT2A-R</i>                                   | 0.022                 |
|                         |                |             |             |             |                                           |                                             |                | <i>MLL1</i> vs. all non- <i>MLL1</i><br><i>KMT2A-R</i>                   | 0.37                  |
|                         |                |             |             |             |                                           |                                             |                | <i>MLL1</i> vs. <i>MLL3</i>                                              | 0.50                  |
|                         |                |             |             |             |                                           |                                             |                | <i>MLL1</i> vs. 'Other' <i>KMT2A-R</i>                                   | 0.020                 |
|                         |                |             |             |             |                                           |                                             |                | <i>MLL3</i> vs. all non- <i>MLL3</i><br><i>KMT2A-R</i>                   | 1.00                  |
| <b>WBC Count</b>        |                |             |             |             |                                           |                                             |                | < 50×10 <sup>9</sup> /L vs. ≥50×10 <sup>9</sup> /L                       |                       |
| < 50×10 <sup>9</sup> /L | 32 (20.4%)     | 6 (7.7%)    | 6 (18.2%)   | 8 (57.1%)   | 7 (35.0%)                                 | 5 (41.7%)                                   | 25 (48.1%)     | <i>KMT2A-G</i> vs. all <i>KMT2A-R</i>                                    | 0.0003                |
|                         |                |             |             |             |                                           |                                             |                | <i>AFF1</i> vs. all non- <i>AFF1</i><br><i>KMT2A-R</i> **                | <0.0001               |
|                         |                |             |             |             |                                           |                                             |                | <i>MLL1</i> vs. all non- <i>MLL1</i><br><i>KMT2A-R</i>                   | 1.00                  |
| ≥ 50×10 <sup>9</sup> /L | 123(78.3%)     | 71(91.0%)   | 26 (78.8%)  | 6 (42.9%)   | 13 (65.0%)                                | 7 (58.3%)                                   | 27 (51.9%)     | <i>MLL1</i> vs. <i>AFF1</i>                                              | 0.18                  |
|                         |                |             |             |             |                                           |                                             |                | <i>MLL1</i> vs. <i>MLL3</i>                                              | 0.015                 |
| Unknown                 | 2 (1.3%)       | 1 (1.3%)    | 1 (3.0%)    | 0 (0%)      | 0 (0%)                                    | 0 (0%)                                      | 0 (0%)         | <i>MLL1</i> vs. 'Other' <i>KMT2A-R</i>                                   | 0.21                  |
|                         |                |             |             |             |                                           |                                             |                | <i>MLL3</i> vs. <i>AFF1</i> , <i>MLL1</i> ,<br>or 'Other' <i>KMT2A-R</i> | 0.0008                |
|                         |                |             |             |             |                                           |                                             |                | <i>MLL3</i> vs. <i>AFF1</i>                                              | <0.0001               |
|                         |                |             |             |             |                                           |                                             |                | <i>MLL3</i> vs. 'Other' <i>KMT2A-R</i>                                   | 0.30                  |

**Supplementary Table 2 (cont'd). Correlations of *KMT2A-G* vs. *KMT2A-R* status and partner genes with demographic and clinical covariates**

|                   | <i>KMT2A-R</i> | <i>AFF1</i> | <i>MLLT1</i> | <i>MLLT3</i> | <i>KMT2A-R</i><br>'Other' Partner<br>Gene | <i>KMT2A-R</i><br>'Unknown'<br>Partner Gene | <i>KMT2A-G</i> | Comparison                                                    | FET<br><i>P</i> value |
|-------------------|----------------|-------------|--------------|--------------|-------------------------------------------|---------------------------------------------|----------------|---------------------------------------------------------------|-----------------------|
| Variable          | N (%)          | N (%)       | N (%)        | N (%)        | N (%)                                     | N (%)                                       | N (%)          |                                                               |                       |
| <b>Sex</b>        |                |             |              |              |                                           |                                             |                | Male vs. Female                                               |                       |
| Male              | 72 (45.9%)     | 36 (46.2%)  | 16 (48.5%)   | 7 (50.0%)    | 10 (50.0%)                                | 3 (25.0%)                                   | 33 (63.5%)     | all <i>KMT2A-R</i> vs. <i>KMT2A-G</i>                         | 0.037                 |
|                   |                |             |              |              |                                           |                                             |                | <i>AFF1</i> vs. <i>KMT2A-G</i>                                | 0.073                 |
|                   |                |             |              |              |                                           |                                             |                | <i>AFF1</i> vs. <i>MLLT1</i>                                  | 0.84                  |
|                   |                |             |              |              |                                           |                                             |                | <i>AFF1</i> vs. <i>MLLT3</i>                                  | 1.00                  |
| Female            | 85 (54.1%)     | 42 (53.8%)  | 17 (51.5%)   | 7 (50.0%)    | 10 (50.0%)                                | 9 (75.0%)                                   | 19 (36.5%)     | <i>AFF1</i> vs. 'Other' <i>KMT2A-R</i>                        | 0.81                  |
| <b>CNS Status</b> |                |             |              |              |                                           |                                             |                |                                                               |                       |
| CNS1              | 71 (45.2%)     | 32 (41%)    | 13 (39.4%)   | 8 (57.1%)    | 12 (60%)                                  | 6 (50%)                                     | 32 (61.5%)     | CNS1; all <i>KMT2A-R</i> vs.<br><i>KMT2A-G</i>                | 0.056                 |
|                   |                |             |              |              |                                           |                                             |                | CNS1 or CNS2; all <i>KMT2A-R</i><br>vs. <i>KMT2A-G</i>        | 0.029                 |
|                   |                |             |              |              |                                           |                                             |                | CNS1; <i>AFF1</i> vs. <i>KMT2A-G</i>                          | 0.032                 |
|                   |                |             |              |              |                                           |                                             |                | CNS1 or CNS2; <i>AFF1</i> vs.<br><i>KMT2A-G</i>               | 0.024                 |
|                   |                |             |              |              |                                           |                                             |                | CNS1; <i>MLLT1</i> vs. <i>KMT2A-G</i>                         | 0.074                 |
|                   |                |             |              |              |                                           |                                             |                | CNS1 or CNS2; <i>MLLT1</i> vs.<br><i>KMT2A-G</i>              | 0.020                 |
|                   |                |             |              |              |                                           |                                             |                | CNS1; <i>AFF1</i> vs. all non-<br><i>AFF1 KMT2A-R</i>         | 0.32                  |
|                   |                |             |              |              |                                           |                                             |                | CNS1 or CNS2; <i>AFF1</i> vs.<br>all non- <i>AFF1 KMT2A-R</i> | 0.85                  |
|                   |                |             |              |              |                                           |                                             |                | CNS1; <i>AFF1</i> vs. <i>MLLT1</i>                            | 1.00                  |
|                   |                |             |              |              |                                           |                                             |                | CNS1 or CNS2; <i>AFF1</i> vs.<br><i>MLLT1</i>                 | 0.65                  |
| CNS2              | 46 (29.3%)     | 25 (32.1%)  | 10 (30.3%)   | 1 (7.1%)     | 5 (25%)                                   | 5 (41.7%)                                   | 15 (28.8%)     | CNS1; <i>AFF1</i> vs. <i>MLLT3</i>                            | 0.23                  |
|                   |                |             |              |              |                                           |                                             |                | CNS1 or CNS2; <i>AFF1</i> vs.<br><i>MLLT3</i>                 | 0.74                  |
|                   |                |             |              |              |                                           |                                             |                | CNS1; <i>AFF1</i> vs. 'Other'<br><i>KMT2A-R</i>               | 0.21                  |
|                   |                |             |              |              |                                           |                                             |                | CNS1 or CNS2; <i>AFF1</i> v.<br>'Other' <i>KMT2A-R</i>        | 0.39                  |
| CNS3              | 38 (24.2%)     | 20 (25.6%)  | 10 (30.3%)   | 4 (28.6%)    | 3 (15%)                                   | 1 (8.3%)                                    | 5 (9.6%)       |                                                               |                       |
| Unknown           | 2 (1.3%)       | 1 (1.3%)    | 0 (%)        | 1 (7.1%)     | 0 (0%)                                    | 0 (%)                                       | 0 (0%)         |                                                               |                       |

Fisher's exact tests (FET) compared the frequencies among the categories specified.

'Other' Partner Gene includes: *EPS15* (n=4); *MLLT10* (n=1); *ACTN4* (n=1); *ACER1* (n=1); and non-*AFF1*/non-*MLLT1*/non-*MLLT3* not further classified (n=13). 'Unknown' Partner Gene includes: non-*AFF1* not further classified (n=5); and *KMT2A-R* not further classified (n=7).

\*1 of 5 *KMT2A-R* non-*AFF1* not further classified was  $\leq 90$  d. \*\*2 of 5 *KMT2A-R* non-*AFF1* not further classified had  $WBC \geq 50 \times 10^9/L$ .

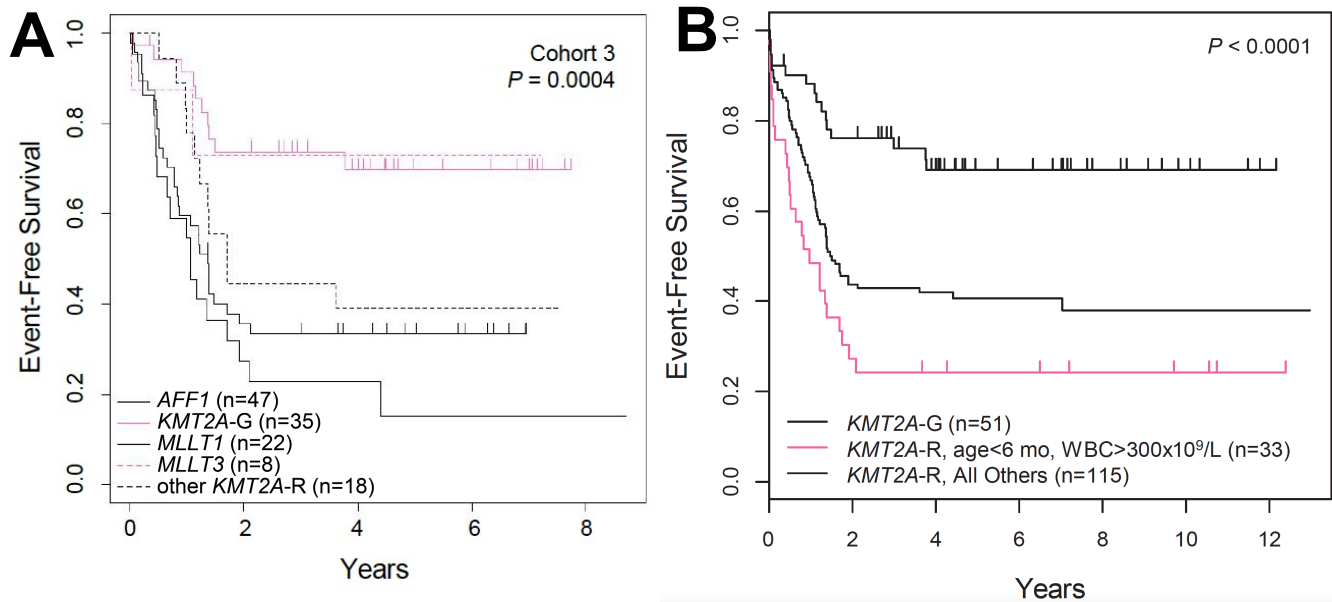

**Supplementary Figure 1. Five-year EFS in COG P9407 infant ALL trial estimated by Kaplan-Meier method.** (A) Five-year EFS in Cohort 3 after treatment modifications to reduce toxicities plotted as a function of *KMT2A-G* and *KMT2A* partner genes. Note similar EFS by genetic subtype in Cohort 3 compared to Cohorts 1, 2, and 3 combined (please see Figure 1A). (B) Kaplan-Meier estimates of EFS in COG P9407 trial plotted by Interfant-99 risk groups. Any *KMT2A-R* with age <6 months and  $WBC > 300 \times 10^9/L$  (high-risk); *KMT2A-R* without either of these features (intermediate-risk; IR); *KMT2A-G* (low-risk; LR). (A-B) Numbers of patients in each risk group are at bottom in the plots. *P* values (top right) were calculated by the log-rank test.
